# Supplementary material
Source: publisher figshare collection journal article supplement (https://tandf.figshare.com/ndownloader/files/20076701)
Supplement: Supplementary file 1 [file 20076701]

# SUPPLEMENTARY MATERIAL

## Upstream characteristics maps.


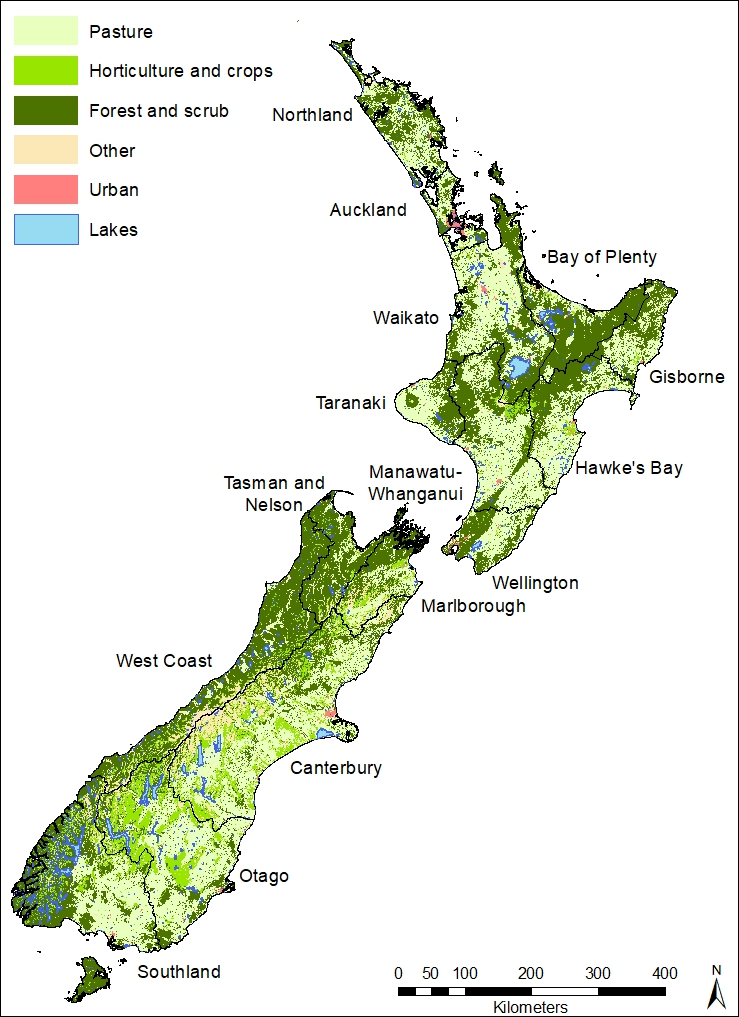


SM Figure 1 Land use; the CLUES land use classes have been aggregated into broad classes for map clarity.


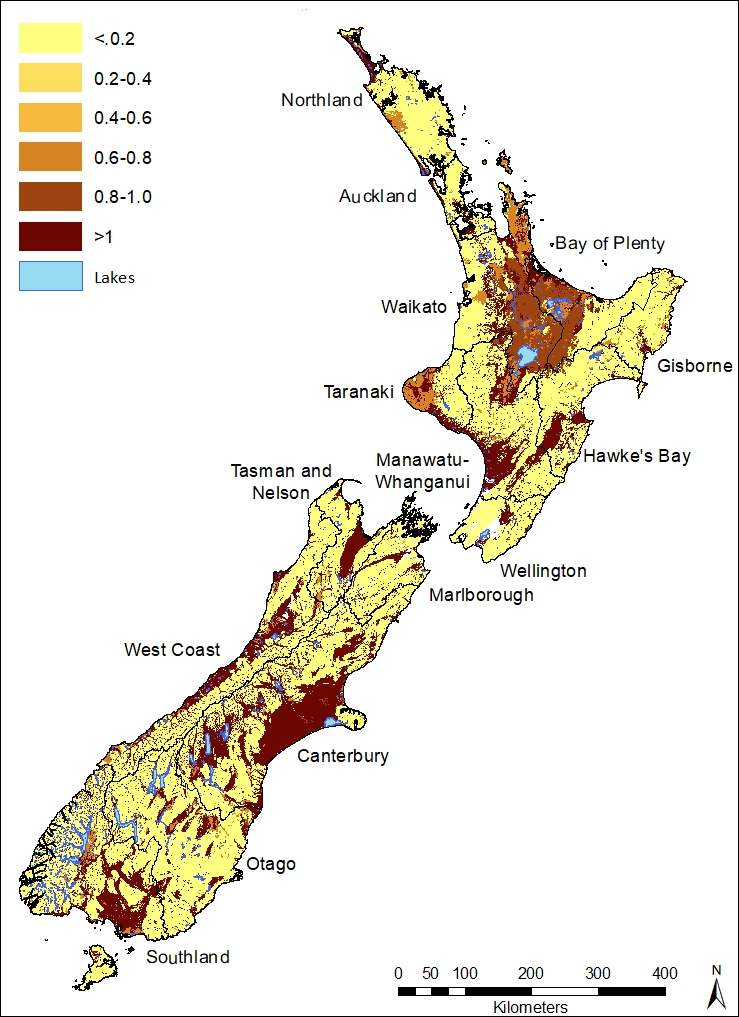


SM Figure 2 Hydraulic conductivity (m/day) of the vadose zone. Data supplied by GNS.


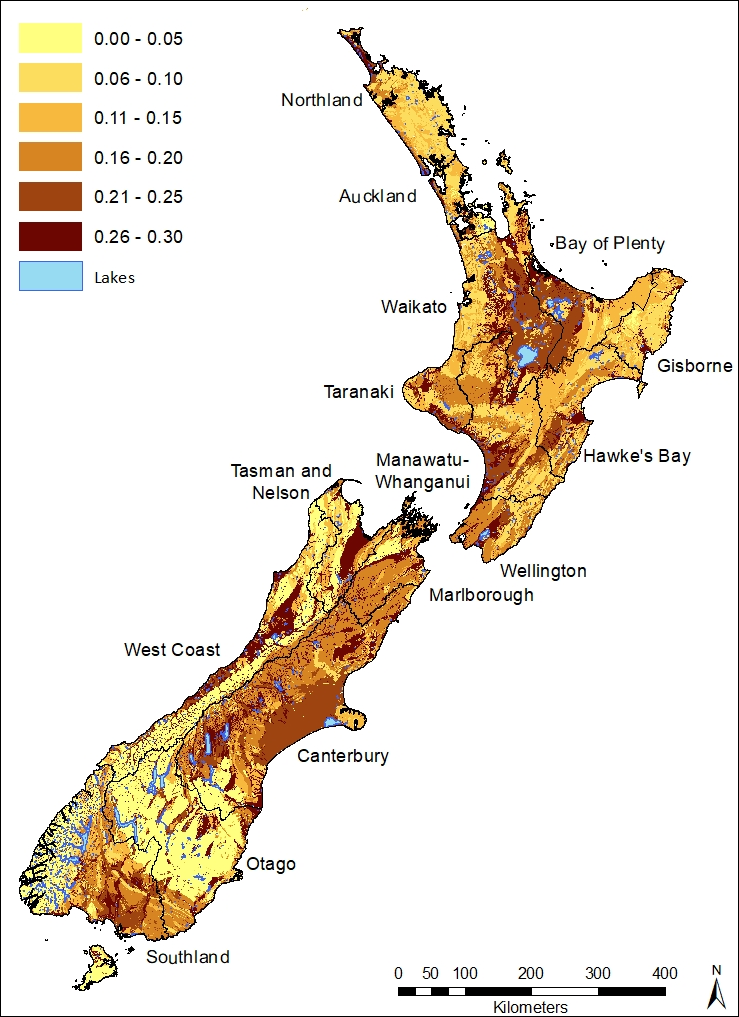


SM Figure 3 Fraction of porosity in the vadose zone. Data supplied by GNS.


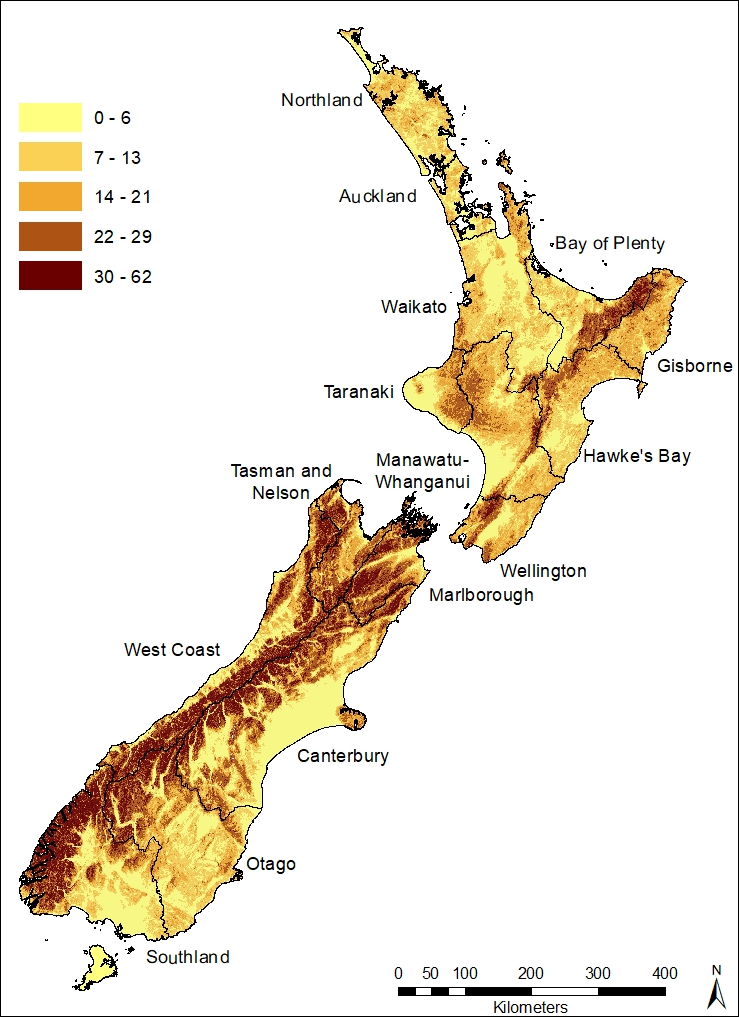


SM Figure 4 Slope (degrees) derived from a 30-m resolution digital terrain model.


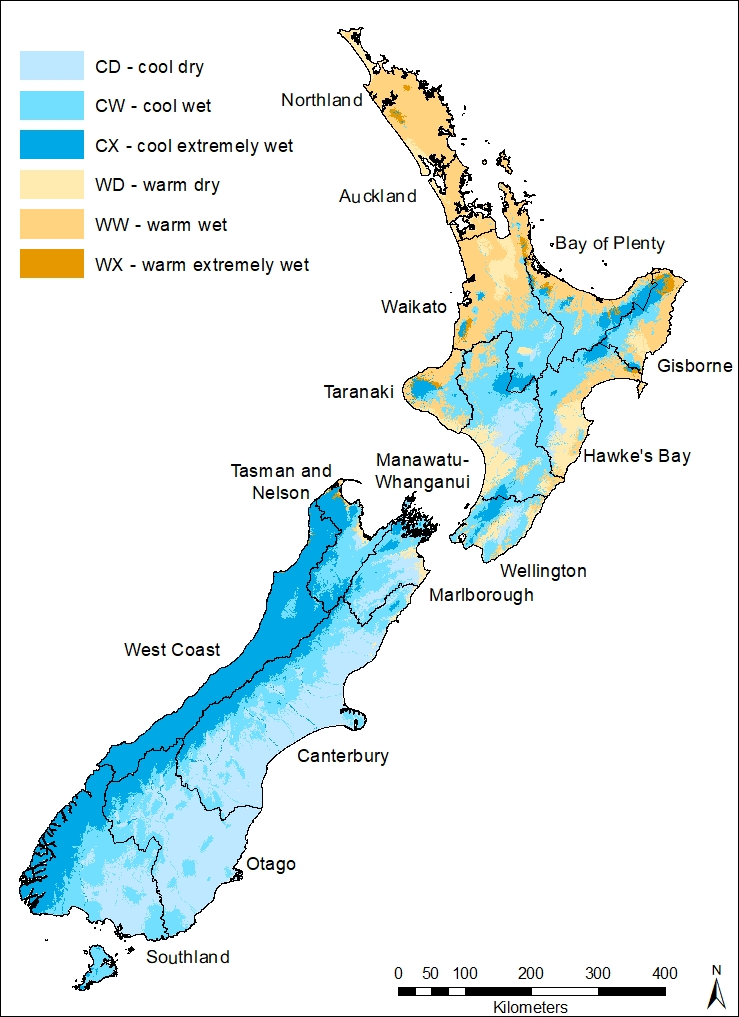


SM Figure 5 Spatial distribution of the REC climate classes


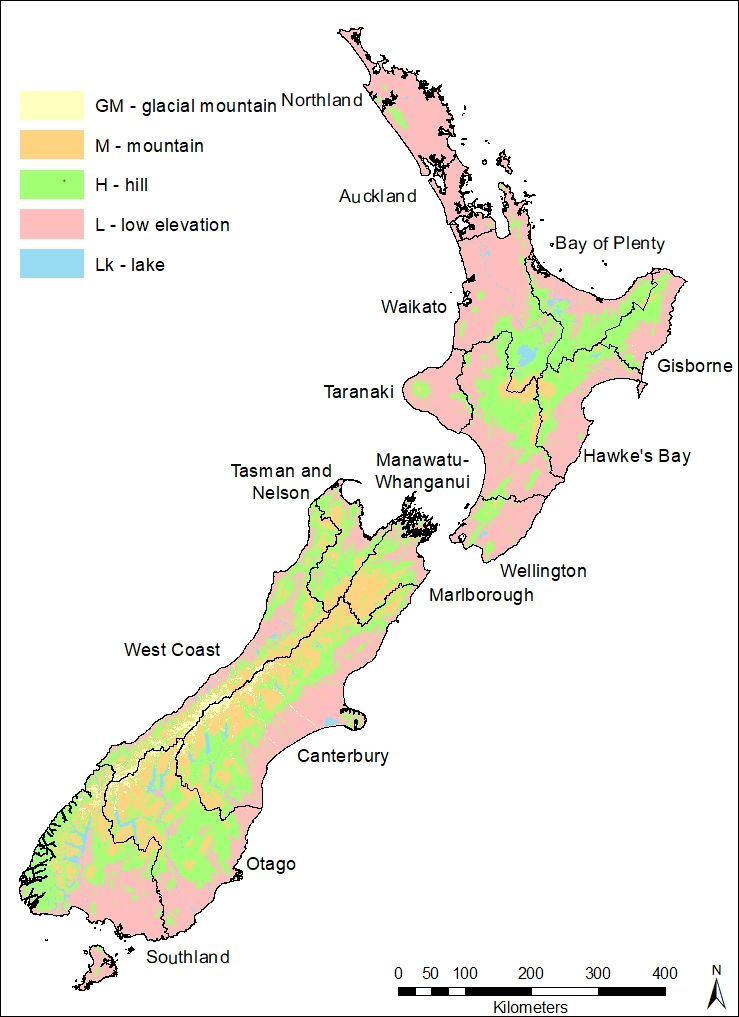


SM Figure 6 Spatial distribution of the REC source of flow classes


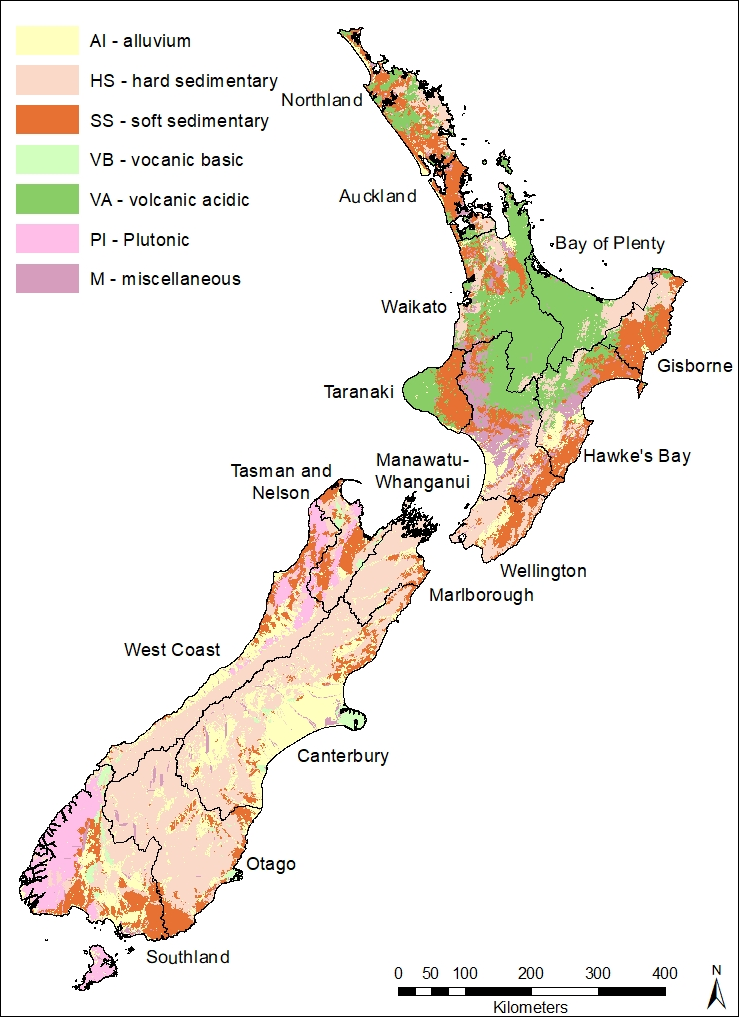


SM Figure 7 Spatial distribution of the REC geology classes

## Regression plots for significant relationships

SM Figure 8 Upstream land use proportion against model residuals for significant (p<5%) relationships

SM Figure 9 Upstream average slope against model residuals for TN with no attenuation

SM Figure 10 Baseflow index against model residuals for significant (p<5%) relationships

## Box plots for classes with significant differences

SM Figure 11 Box-plots by super region for TN with and without attenuation

SM Figure 12 Box-plots by climate class for *E. coli* and TN with and without attenuation
